# Supplementary material for: A model established using marital status and other factors from the Surveillance, Epidemiology, and End Results database for early stage gastric cancer
Source: HighWire-hosted journal article supplement (doi:10.1136/jim-2021-002285), 2022-07-06
Supplement: jim-2021-002285supp002_data_supplement.pdf [file jim-2021-002285supp002_data_supplement.pdf]

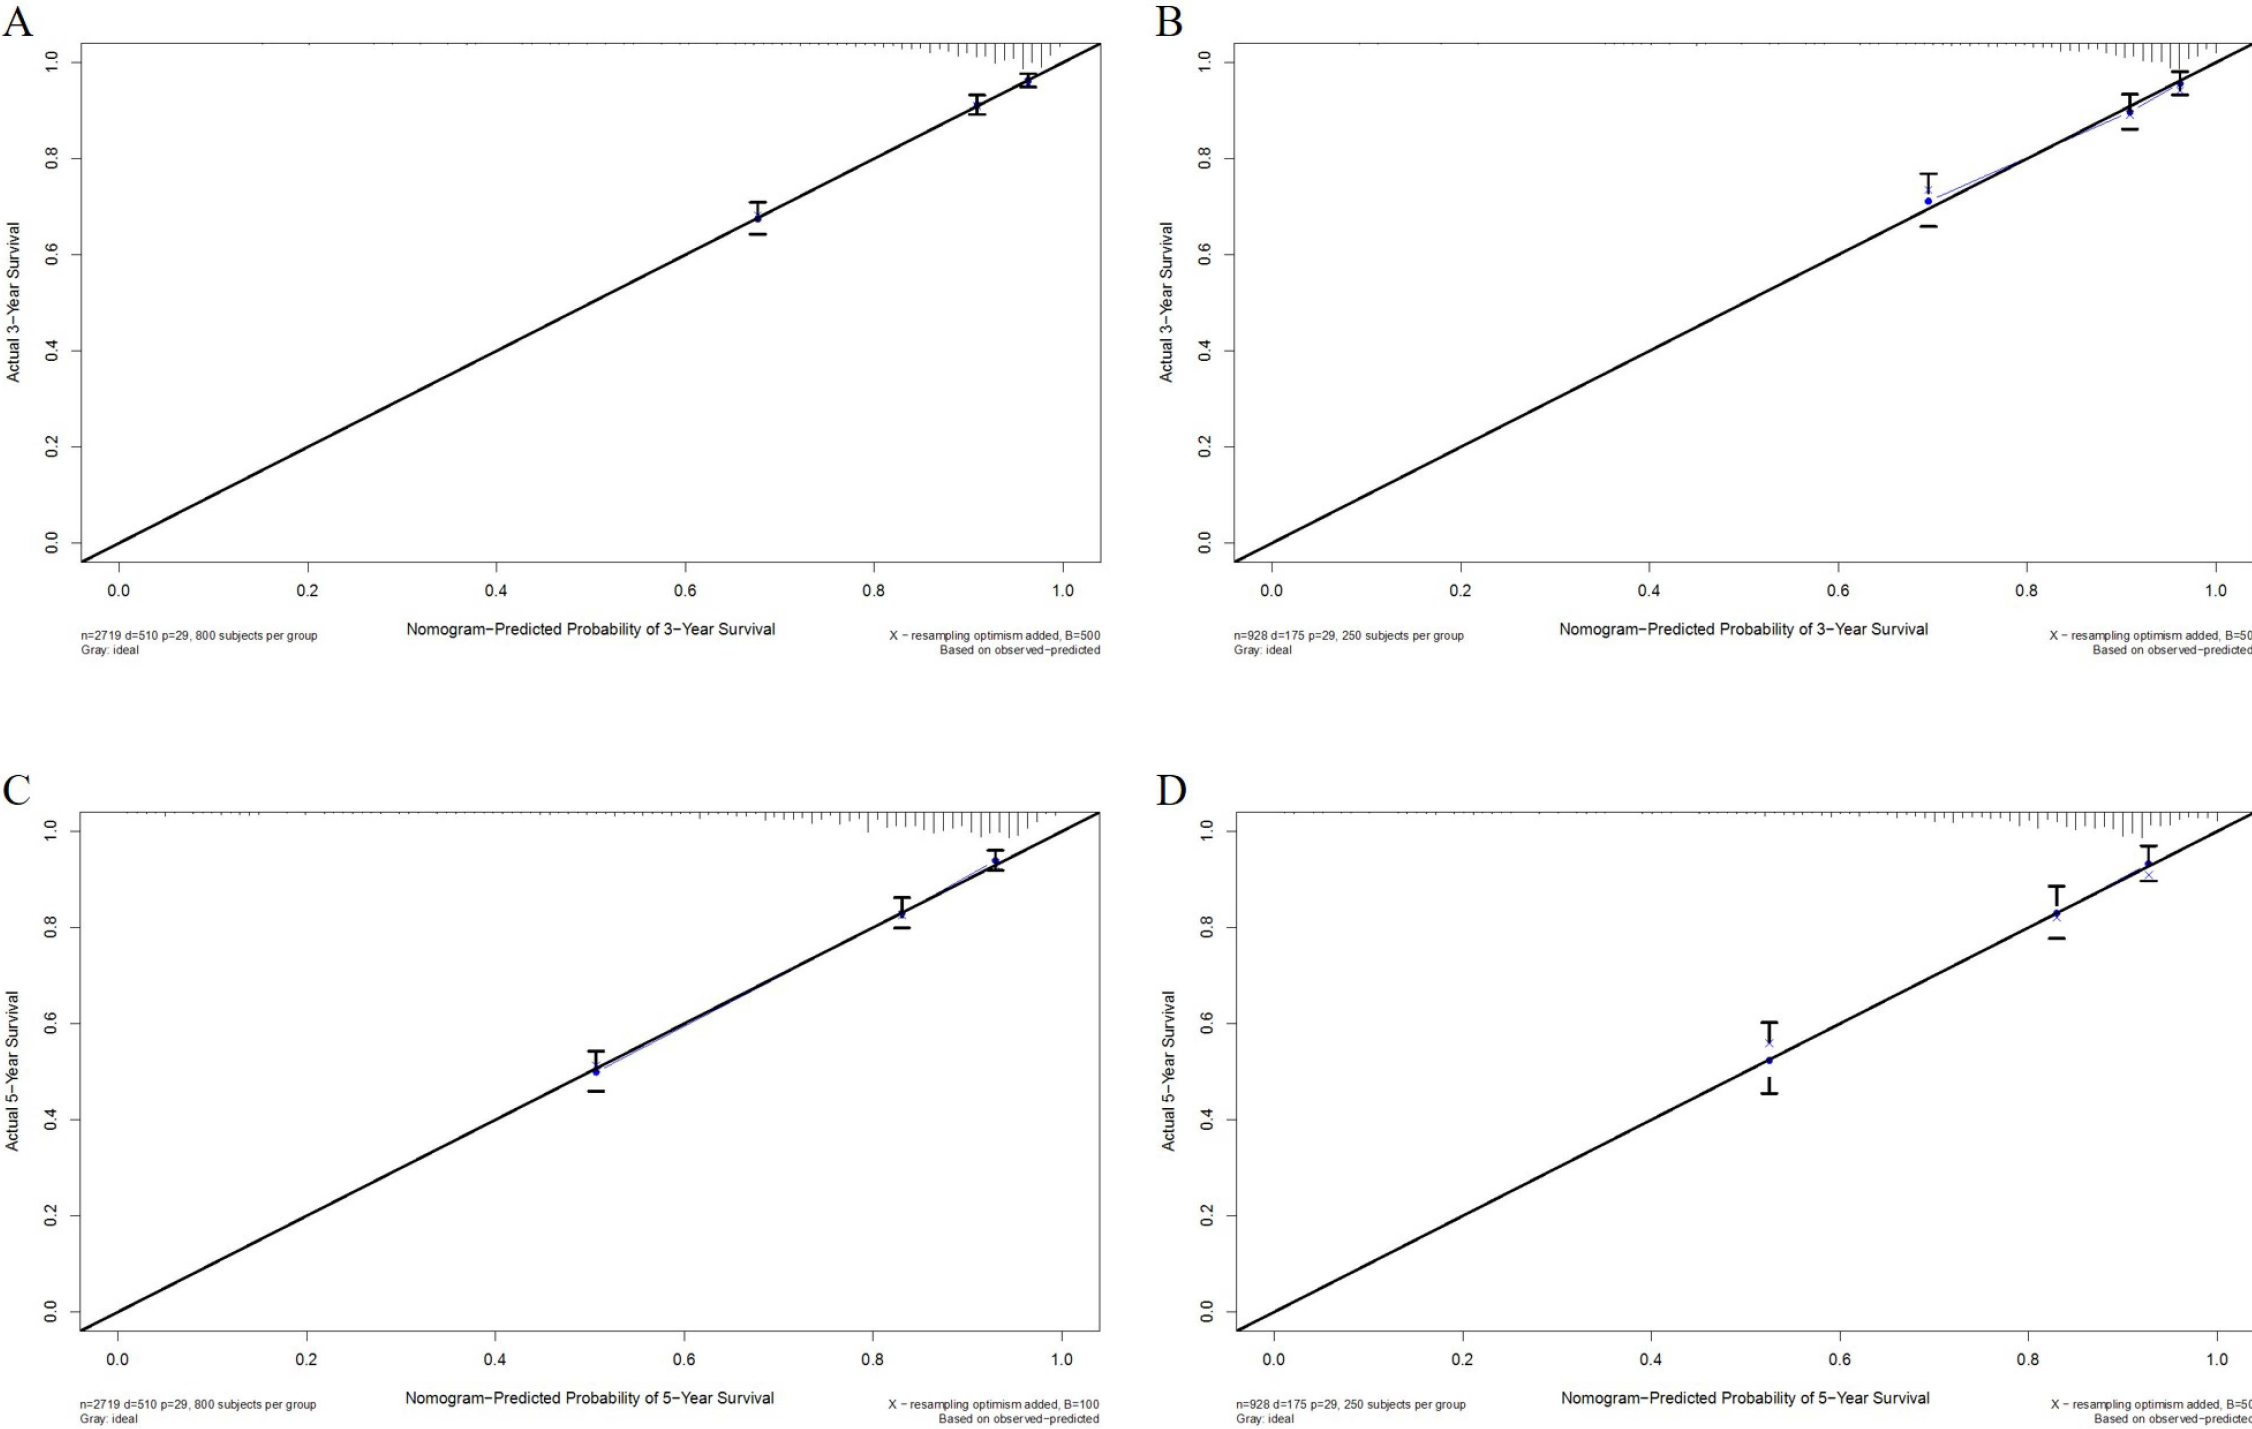

omogram for predicting 3- and 5-year overall survivals of patients with early-stage gastric cancer. Three-year overall survival of (A) training set and (B) testing set; five-year overall survival of (C) training set and (D) testing set.

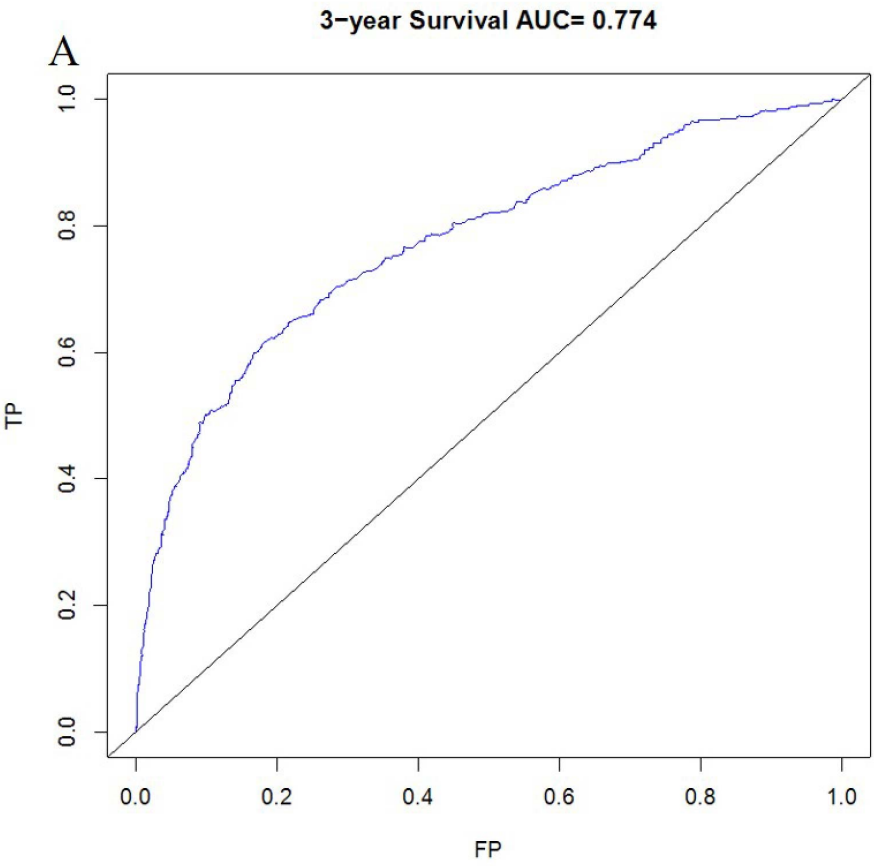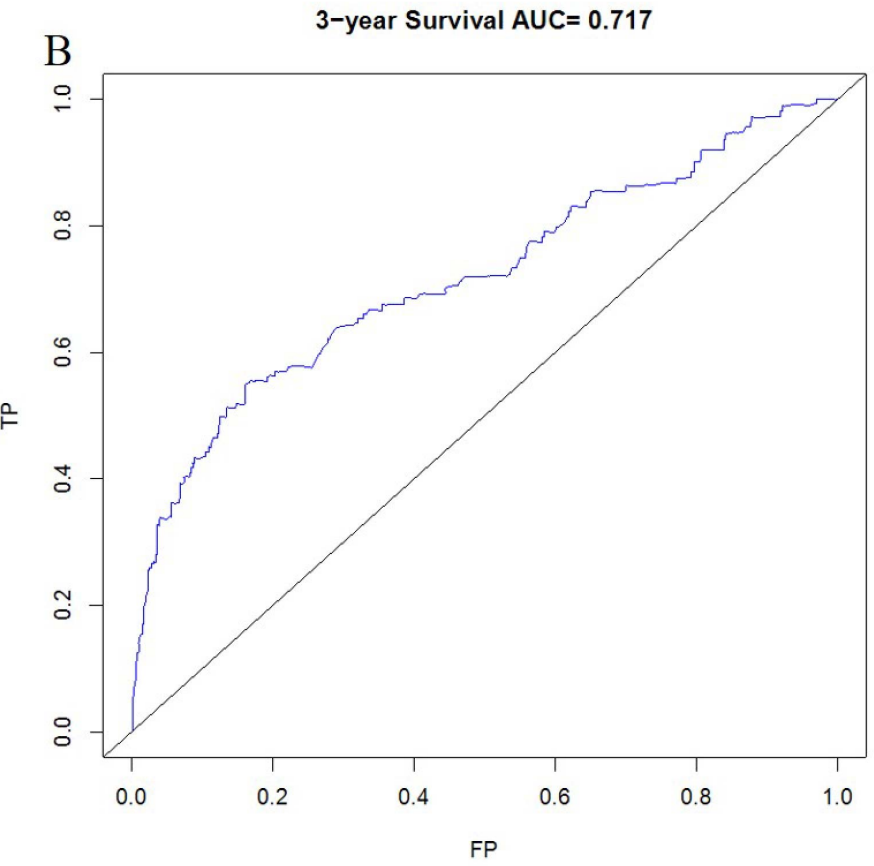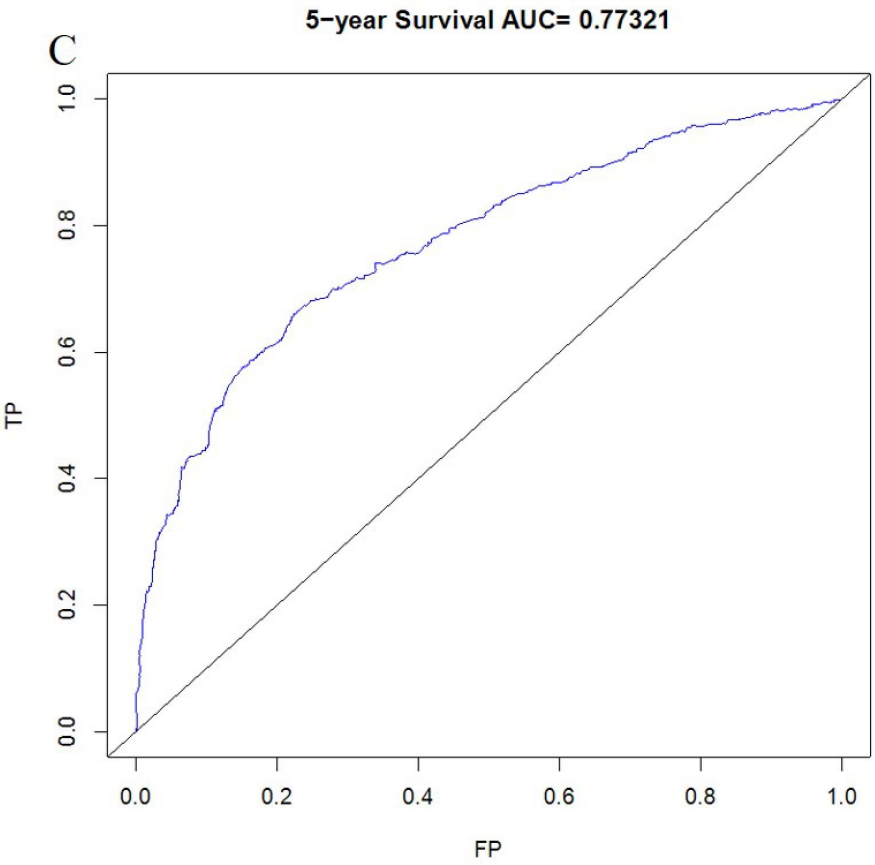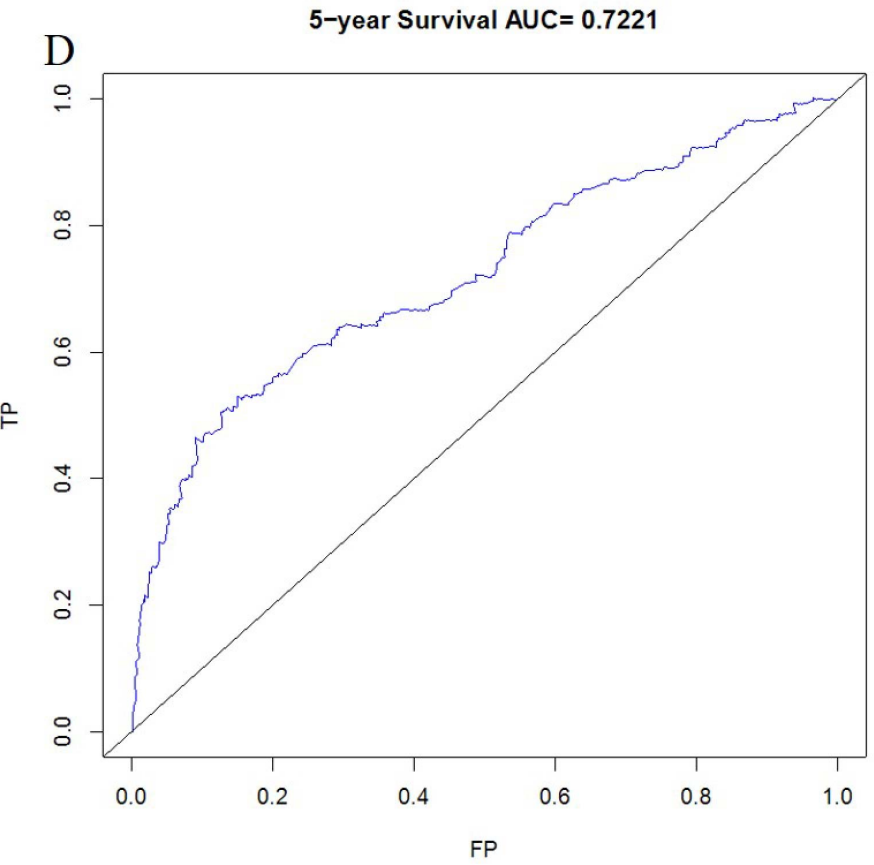

ar survival of (A) training set and (B) testing set; Receiver operating  
aracteristic curves of 5-year survival of (C) training set and (D) testir  
t.

### Survival curve of risk score(P=0)

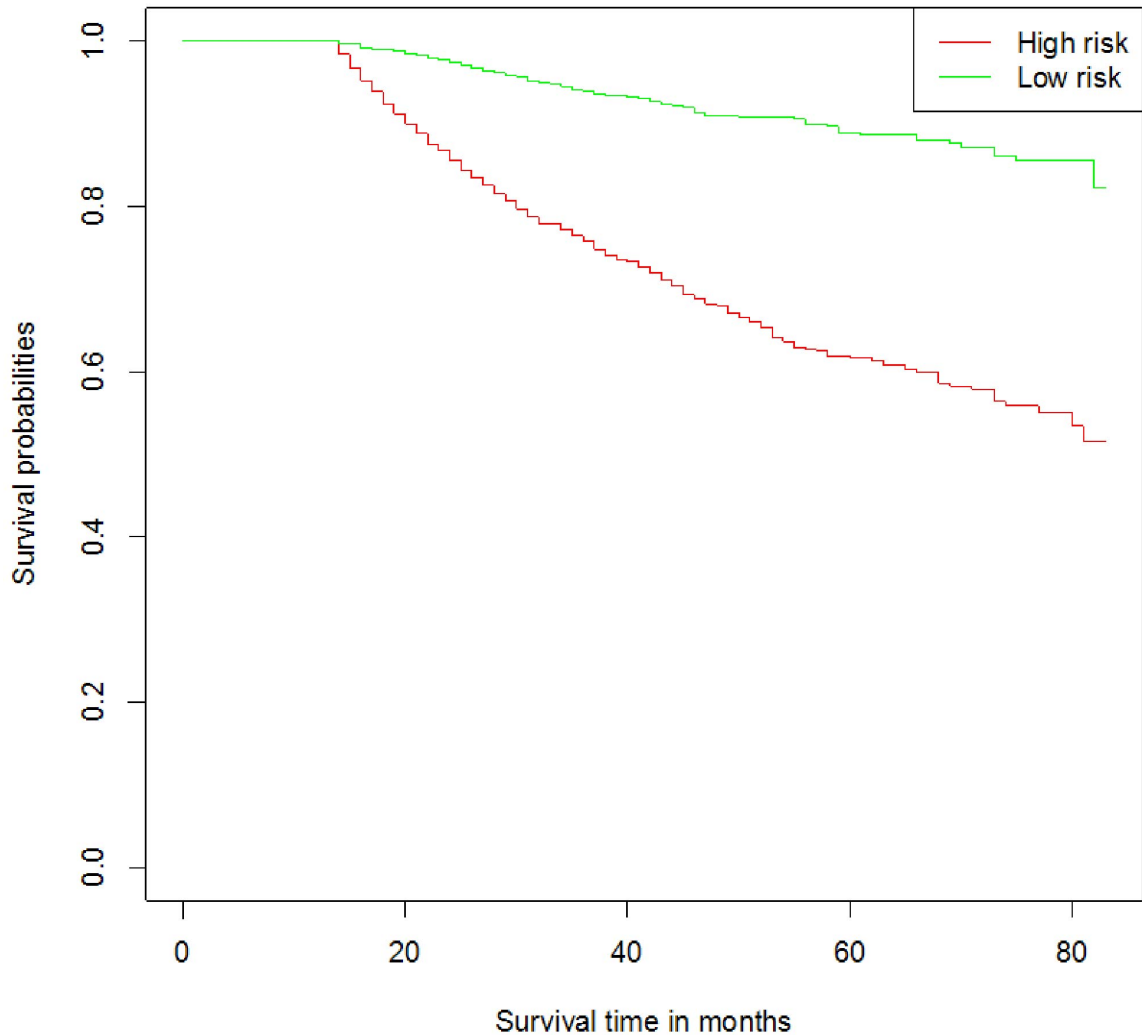

oup and high risk group)
